# Supplementary material for: LiFePO4/C twin microspheres as cathode materials with enhanced electrochemical performance
Source: Royal Society of Chemistry journal article supplement (doi:10.1039/d3ra00183k), 2023-01-01
Supplement: d3ra00183k1.pdf [file d3ra00183k1.pdf]

Supporting Information

# LiFePO<sub>4</sub>/C Twin Microspheres as Cathode Materials with Enhanced Electrochemical Performance

*Yiqiong Peng, Lingzhi Zeng, Shuai Dai, Feng Liu, Xi Rao\*, and Yongping Zhang\**

School of Materials and Energy, Southwest University, Chongqing 400715, China

\*Corresponding authors, E-mail: [zhangyyping6@swu.edu.cn](mailto:zhangyyping6@swu.edu.cn) (Y. Zhang), and [raoxiemail@swu.edu.cn](mailto:raoxiemail@swu.edu.cn) (X. Rao)

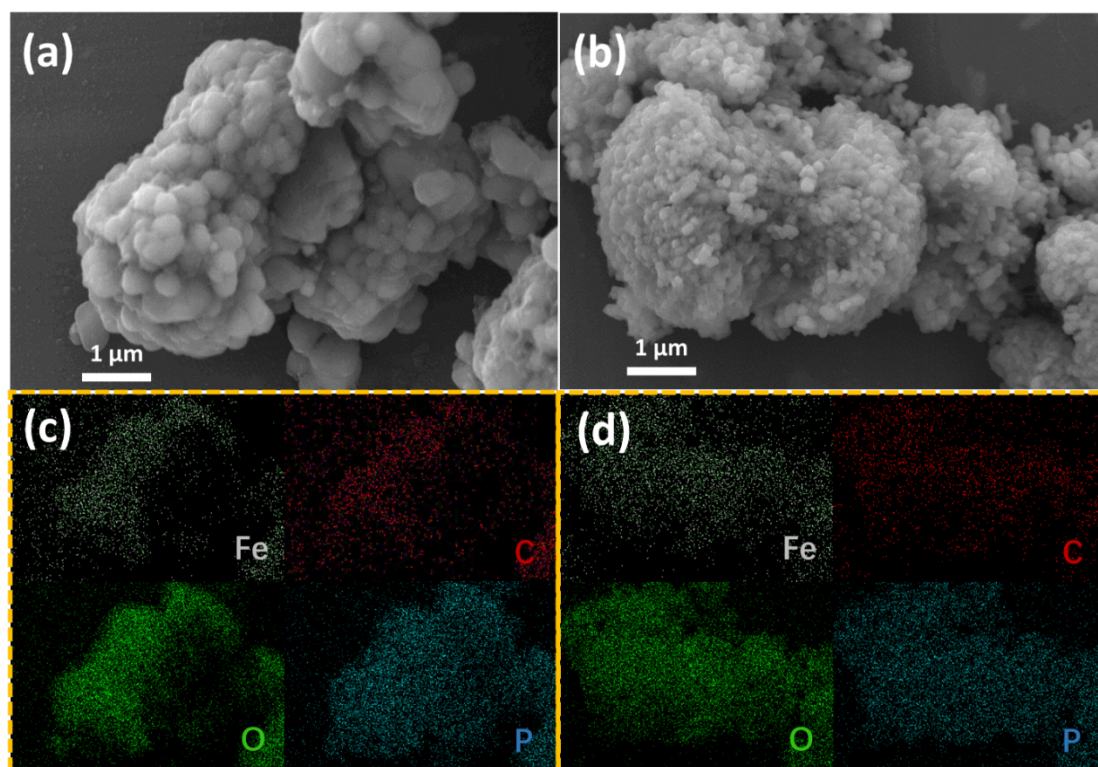

**Fig. S1.** SEM images (a, b) and corresponding EDS mapping (c, d) of LFP/C-40, LFP/C-80;

SEM images in Fig. S2 showed that most of the  $\text{LiFePO}_4/\text{C}$ -60 samples appeared as twin microsphere structure with slightly different size. In addition, a small number of twin microspheres were broken during ultrasound process during sample preparation.

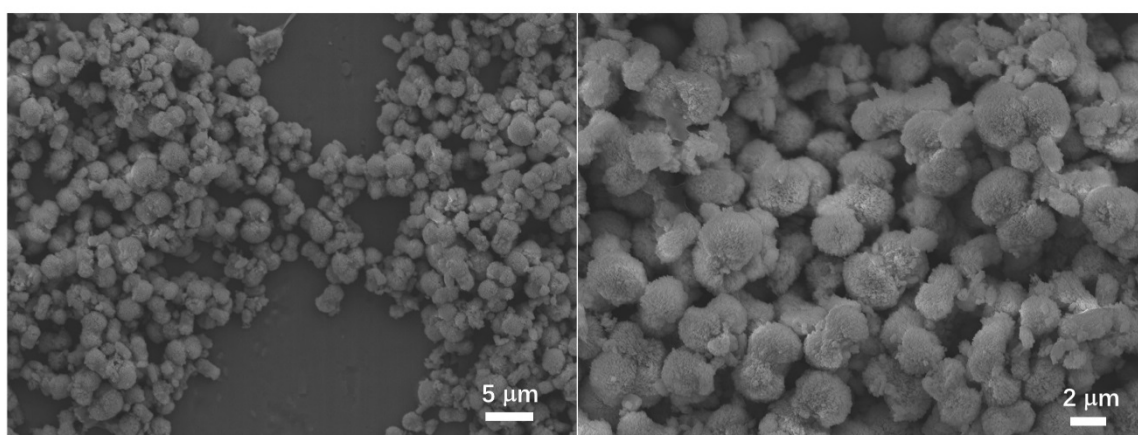

**Fig. S2.** SEM images of  $\text{LiFePO}_4/\text{C}$ -60.

The  $\text{LiFePO}_4/\text{C}$ -60 twin microspheres present a hierarchical structure assembled by nanoparticles. The hierarchical structure facilitates the rapid and effective transport of matter and charge due to its unique geometric structure<sup>1</sup>. Twin microspheres structures have some advantages. Firstly, the transport of lithium ions in lithium iron phosphate occurs on one-dimensional channels. When there are two or more point defects in the diffusion channel,  $\text{Li}^+$  cannot enter the material through any side of the tunnel opening, resulting in low utilization of active materials<sup>2</sup>. Nano-sized primary particles promote the transport of  $\text{Li}^+$  ions by reducing the diffusion distance, improve the utilization of active lithium ions, and smooth the diffusion path to ensure high capacity and rate

capability<sup>2</sup>. Secondly, in practical applications, the low ion diffusion rate is a key factor in the performance of  $\text{LiFePO}_4$ <sup>3</sup>. The porous structure made of uniformly distributed primary particles allows the electrolyte to penetrate finely into the internal active material. The hierarchical structure contributes to the effective contact between  $\text{LiFePO}_4$  particles and electrolyte, thereby reducing polarization<sup>4</sup>. Thirdly, electrodes made of nanoscale materials are prone to collapse because they cannot be stacked as densely on collectors as micron materials. The micron-sized and robust secondary porous microstructure framework can effectively buffer the aggregation of particles. The micron size and stable secondary porous microstructure can effectively alleviate the aggregation of particles<sup>5</sup>. Fourthly, the large surface area and porous structure of nanomaterials usually result in lower tap density, which leads to lower bulk density of the electrode loaded with nanomaterials<sup>2</sup>. Fourthly, the large surface area and porous structure of nanomaterials usually result in lower tap density, which leads to lower bulk density of the electrode loaded with nanomaterials<sup>6</sup>. In summary, the twin microspheres hierarchical structure integrates the advantages of microsphere particles, porosity, nanocrystallization and carbon coating, ensuring excellent electrochemical performance and good processing performance. Therefore, this twin microsphere structure is a key factor in lithium  $\text{LiFePO}_4/\text{C}$  samples.

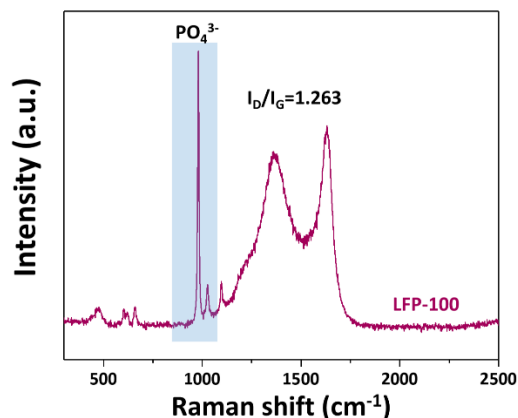

**Fig. S3.** Raman spectrum of LFP-100;

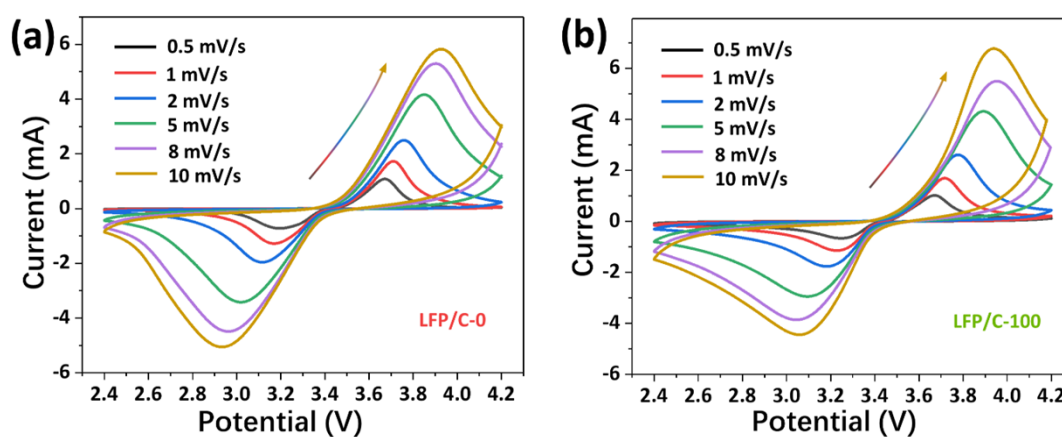

**Fig. S4.** CV curves of LFP/C-0 (a), and LFP/C-100 (b) with different scanning rate between 0.5mV/s and 10mV/s;

High loading increases the ratio of active materials to inactive packaging materials, but it may cause a decrease in discharge capacity<sup>2</sup>. In order to explore the influence of loading amount, the medium (4 mg cm<sup>-2</sup>) and high (8 mg cm<sup>-2</sup>) loading were assembled into button batteries. The discharge capacity was tested at different discharge rates at room temperature, as shown in Fig. S5. The discharge capacity of LFP-60 with medium load and high load reached 146.6 mA·h·g<sup>-1</sup> and 135.1 mA·h·g<sup>-1</sup>

at 0.2 C discharge rate, while the discharge capacity of LFP-0 is 68.0 mA h g<sup>-1</sup>, 66.3 mA h g<sup>-1</sup>, and the discharge capacity of LFP-100 is 96.9 mA·h·g<sup>-1</sup>, 92.4 mA·h·g<sup>-1</sup>, respectively. The high-loading discharge performance of LFP/C-60 is significantly better than the other two groups of samples. The three-dimensional conductive network constructed in the twin microspheres structure may be the reasons for its excellent performance.

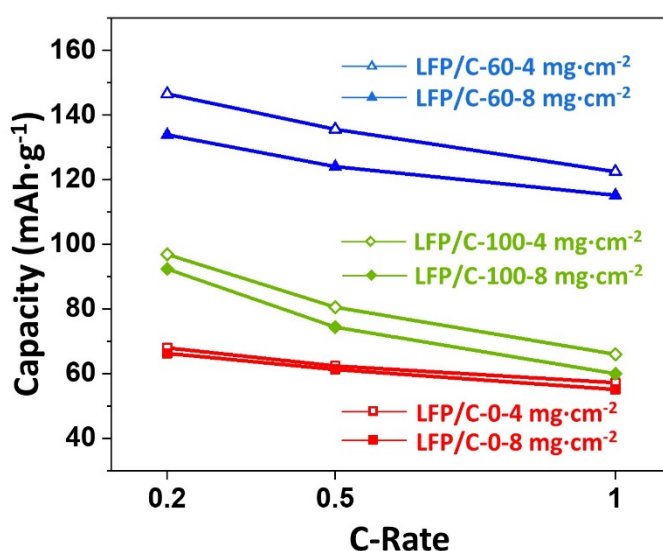

**Fig. S5.** Discharge capacity of LFP/C-0, LFP/C-60, LFP/C-100 at different C-rates with medium and high loading.

#### References

1. Y. Wu, Z. Wen and J. Li, *Advanced Materials*, 2011, **23**, 1126-1129.
2. Z. Yang, Y. Dai, S. Wang and J. Yu, *Journal of Materials Chemistry A*, 2016, **4**, 18210-18222.
3. J. Hu, W. Huang, L. Yang and F. Pan, *Nanoscale*, 2020, **12**, 15036-15044.
4. Z. Li, J. Yang, T. Guang, B. Fan, K. Zhu and X. Wang, *Small Methods*, 2021, **5**, 2100193.
5. J. Bai, X. Li, G. Liu, Y. Qian and S. Xiong, *Advanced Functional Materials*, 2014, **24**, 3012-3020.
6. H. Wang, L. Liu, R. Wang, X. Yan, Z. Wang, J. Hu, H. Chen, S. Jiang, L. Ni, H. Qiu, H. Tang, Y. Wei, Z. Zhang, S. Qiu and F. Pan, *ChemSusChem*, 2018, **11**,

2255-2261.
